# Supplementary material for: Host Generated siRNAs Attenuate Expression of Serine Protease Gene in Myzus persicae
Source: PLoS One. 2012 Oct 10;7(10):e46343. doi: 10.1371/journal.pone.0046343 (PMC3468595; doi:10.1371/journal.pone.0046343)
Supplement: Table S3 — Statistical analyses of aphid fecundity in bioassay. (DOC) [file pone.0046343.s006.doc]

**Table S3. Statistical analyses of aphid fecundity in bioassay.**

Aphids fed on SP-transgenic *A. thaliana* plants produce significantly less progenies compared to their counterpart fed on control plants. Statistical analyses of aphid fecundity on 8th and 15th day after the release in six biological replicates revealed significant mean differences compared to the control-fed aphids. The mean difference between different transgenic lines was significant for 8th day albeit no significant difference was found for mean values on 15th day.

(Univariate ANOVA, *n=6*, P<0.05).

| ***MySP*** | **Fecundity on *A. thaliana* on 8th day post-release**  **(P-value)** | **Fecundity on *A. thaliana* on 15th day post-release**  **(P-value)** |
| --- | --- | --- |
| Control – SP8 | 0.000* | 0.000* |
| Control – SP17 | 0.000* | 0.000* |
| Control – SP20 | 0.000* | 0.000* |
| SP8 - SP17 | 0.017* | ** |
| SP17 – SP20 | 0.000* | ** |
| SP20 - SP8 | 0.009* | ** |

*. The mean difference is significant at the 0.05 level.

**. The mean difference is not significant.
